# Supplementary material for: NUPR1 is a critical repressor of ferroptosis
Source: PubMed Central journal article supplement (PMC7843652; doi:10.1038/s41467-021-20904-2), 2021-01-28
Supplement: 41467_2021_20904_MOESM1_ESM.pdf [file 41467_2021_20904_MOESM1_ESM.pdf]

## Supplementary Information

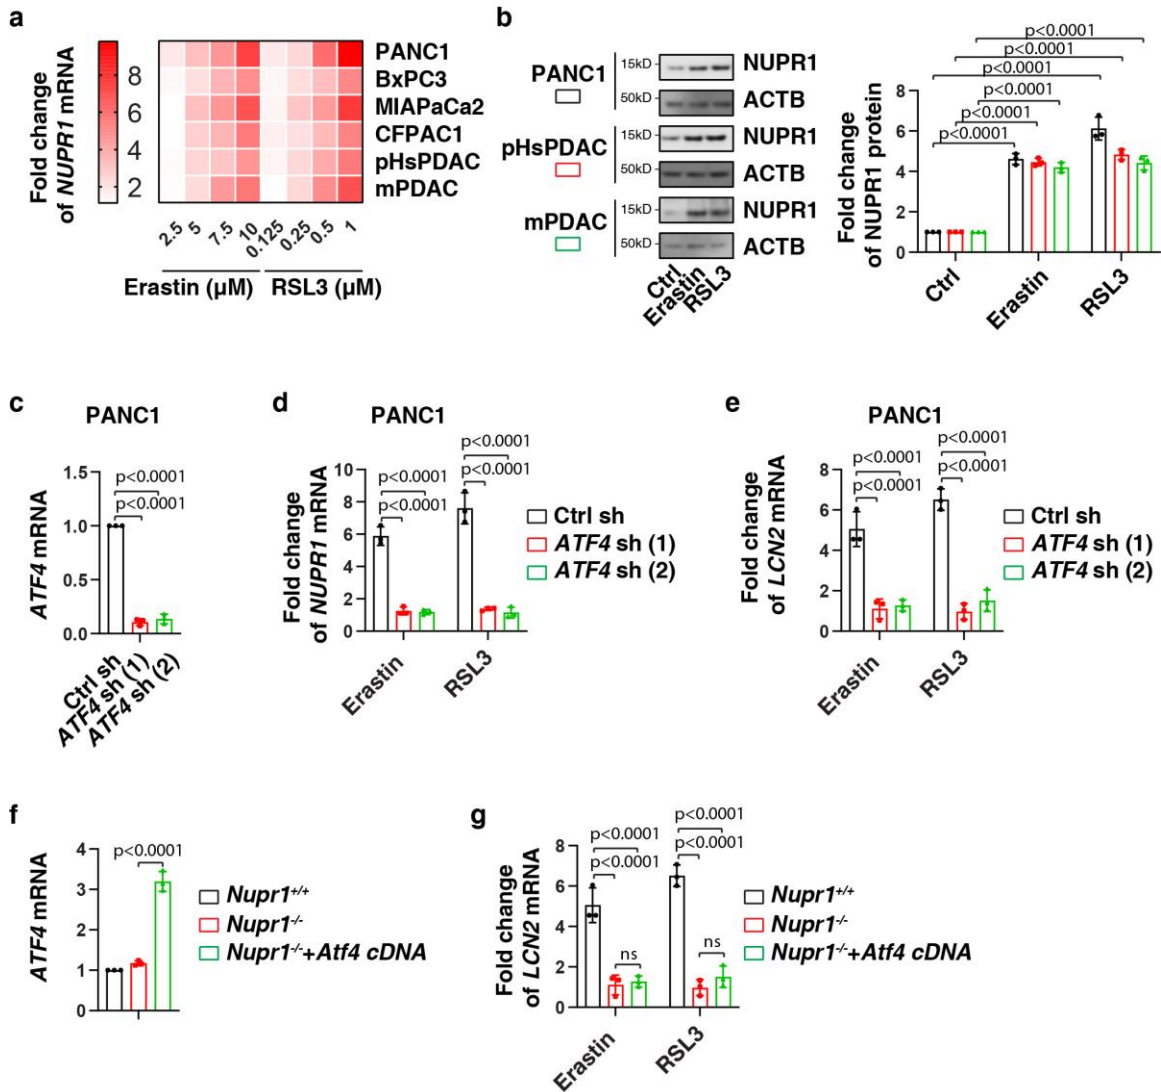

**Supplementary Figure 1. ATF4-mediated NUPR1 upregulation in ferroptosis.** (a) Heatmap of relative mRNA levels of *NUPR1* in indicated PDAC cells following treatment with erastin or RSL3 for 24 h. (b) Western blot analysis of NUPR1 expression in indicated PDAC cells following treatment with erastin (10  $\mu\text{M}$ ) or RSL3 (1  $\mu\text{M}$ ) for 24 h (n= 3 well/group, two way ANOVA with Tukey's multiple comparisons test on all pairwise combinations). (c-e) Knockdown of ATF4 by shRNA inhibited NUPR1 or

LCN2 upregulation in PANC1 cells following treatment with erastin (10  $\mu$ M) or RSL3 (1  $\mu$ M) for 24 h (n= 3 well/group, one or two way ANOVA with Tukey's multiple comparisons test on all pairwise combinations). (f, g) overexpression of ATF4 failed to induce *Lcn2* upregulation in *Nupr1*<sup>-/-</sup> mPDAC cells following erastin (10  $\mu$ M) or RSL3 (1  $\mu$ M) for 24 h (n= 3 well/group, one or two way ANOVA with Tukey's multiple comparisons test on all pairwise combinations). Data in (b-g) are presented as mean  $\pm$ SD. The results in (b-g) are representative of those from 2-3 independent experiments with 3 technical replicates each.

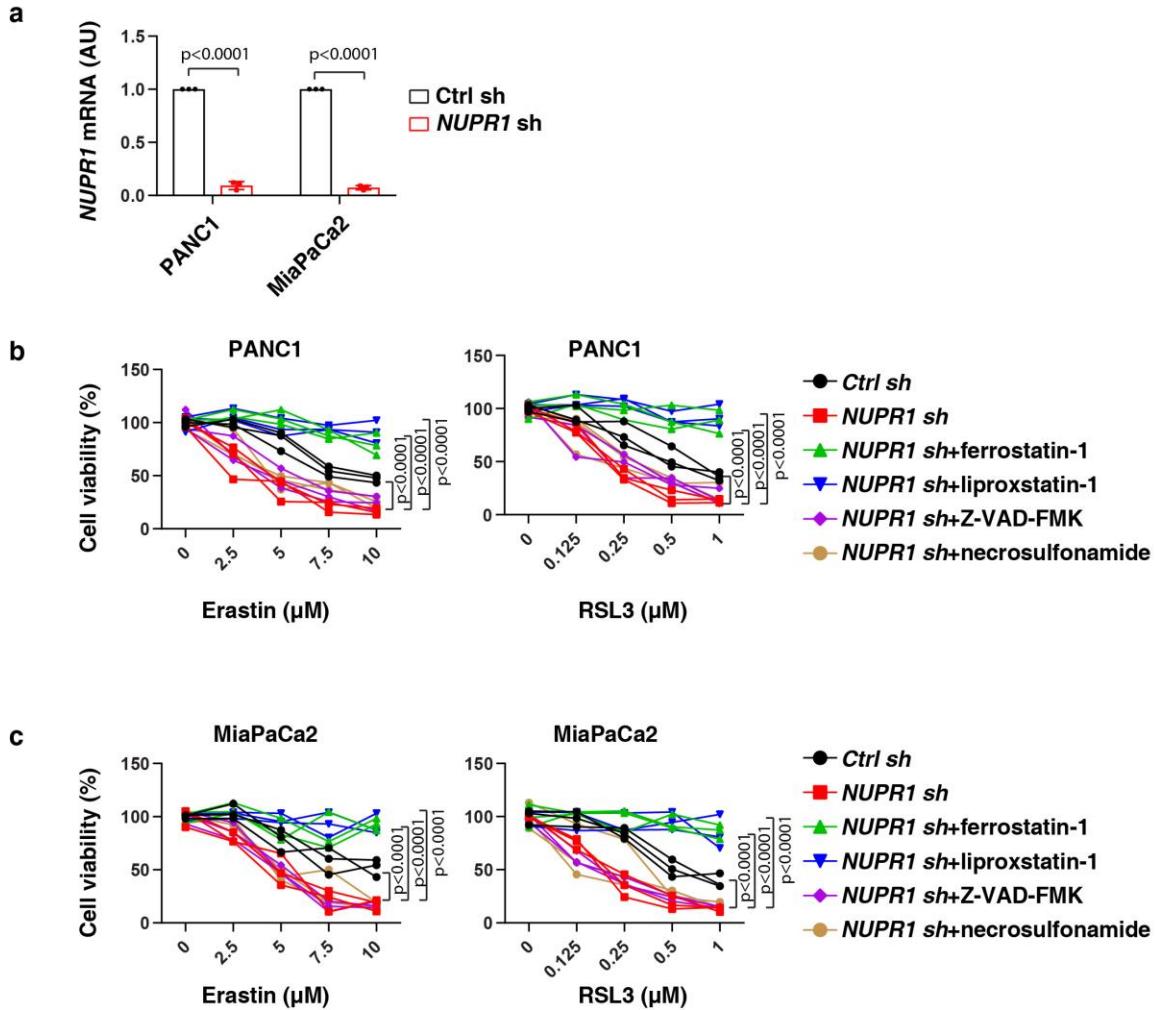

**Supplementary Figure 2. NUPR1 acts as a repressor of ferroptosis.** (a) Western blot analysis of NUPR1 expression in indicated PANC1 or MiaPaCa2 cells ( $n = 3$  well/group, one-tailed  $t$  test). (b, c) Indicated PANC1 or MiaPaCa2 cells were treated with erastin or RSL3 in the absence or presence of ferrostatin-1 ( $1 \mu\text{M}$ ), lipoxstatin-1 ( $1 \mu\text{M}$ ), Z-VAD-FMK ( $10 \mu\text{M}$ ), or necrosulfonamide ( $1 \mu\text{M}$ ) for 24 h, and then cell viability was assayed ( $n = 3$  well/group, two way ANOVA with Tukey's multiple comparisons test on all pairwise combinations). Data in (a-c) are presented as mean  $\pm$  SD. The results in (a-c) are representative of those from 2 independent experiments with 3 technical replicates each.

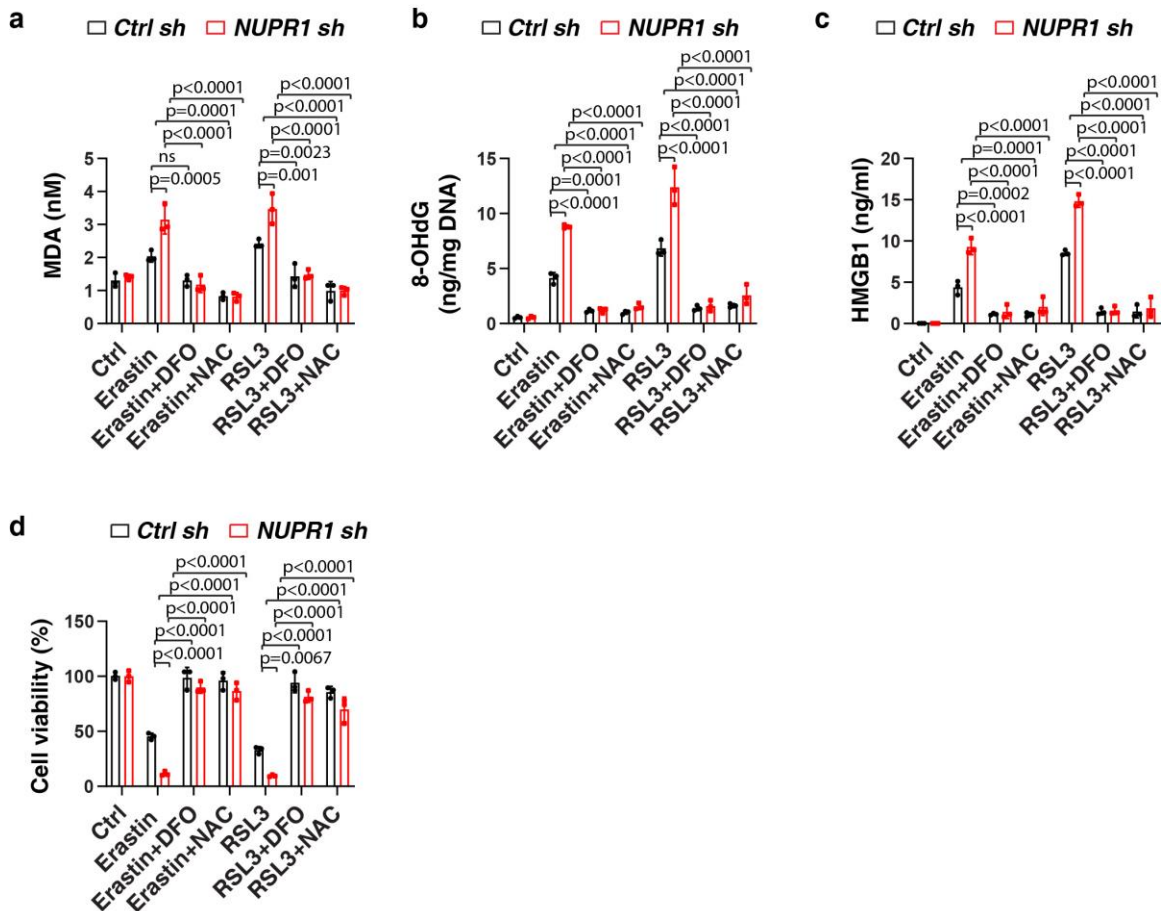

**Supplementary Figure 3. NUPR1 inhibits iron-dependent oxidative damage in ferroptosis.** Indicated PANC1 cells were treated with erastin (10  $\mu$ M) or RSL3 (1  $\mu$ M) in the absence or presence of DFO (100  $\mu$ M) or NAC (1 mM) for 24 h, and then intracellular MDA (a), intracellular 8-OHdG (b), extracellular HMGB1 (c), and cell viability (d) were assayed (n= 3 well/group, two way ANOVA with Tukey’s multiple comparisons test on all pairwise combinations). ns: not significant. Data in (a-d) are presented as mean  $\pm$ SD. The results in (a-d) are representative of those from 2 independent experiments with 3 technical replicates each.

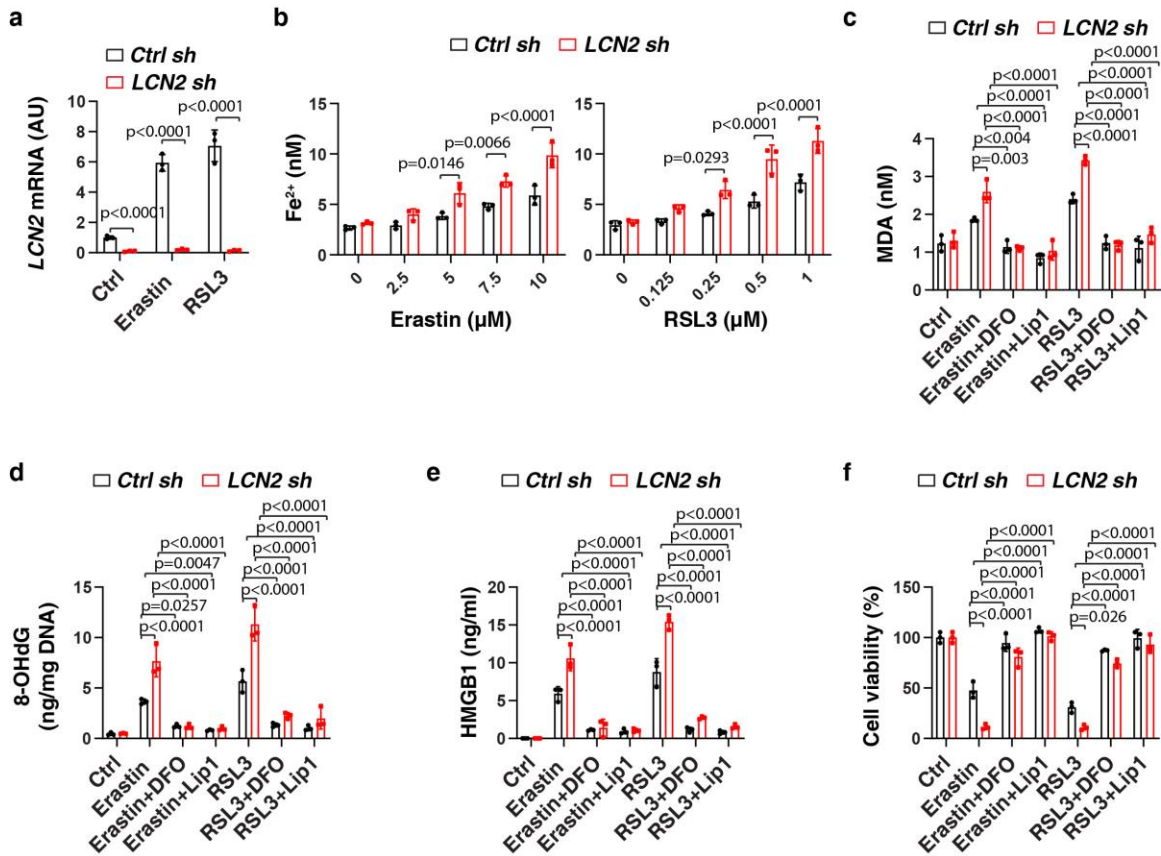

**Supplementary Figure 4. LCN2 inhibits ferroptosis.** (a) qPCR analysis of *LCN2* mRNA in indicated PANC1 cells following treatment with erastin (10  $\mu$ M) or RSL3 (1  $\mu$ M) for 24 h ( $n = 3$  well/group; one-tailed  $t$  test). (b)  $Fe^{2+}$  levels in indicated PANC1 cells following treatment with erastin or RSL3 for 24 h ( $n = 3$  well/group, two way ANOVA with Tukey's multiple comparisons test on all pairwise combinations). (c-f) Indicated PANC1 cells were treated with erastin (10  $\mu$ M) or RSL3 (1  $\mu$ M) in the absence or presence of DFO (100  $\mu$ M) or liproxstatin-1 (1  $\mu$ M) for 24 h, and then intracellular MDA (c), intracellular 8-OHdG (d), extracellular HMGB1 (e), and cell viability (f) were assayed ( $n = 3$  well/group, two way ANOVA with Tukey's multiple comparisons test on all pairwise combinations). Data in (a-f) are presented as mean  $\pm$  SD. The results in (a-f)

are representative of those from 2 independent experiments with 3 technical replicates each.

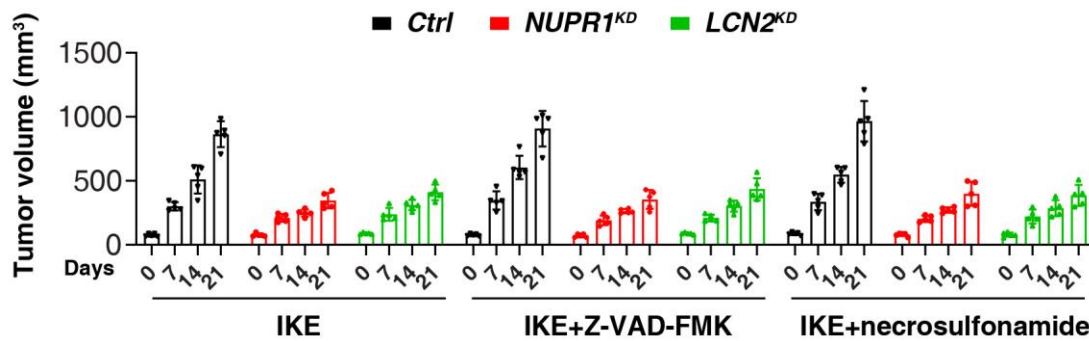

**Supplementary Figure 5. Effects of Z-VAD-FMK and necrosulfonamide on IKE-mediated tumor suppression *in vivo*.** Athymic nude mice were injected subcutaneously with indicated *PDHA1*-knockdown (*NUPR1<sup>KD</sup>*) or *LCN2*-knockdown (*LCN2<sup>KD</sup>*) PANC1 cells for 7 days and then treated with IKE (40 mg/kg, i.p., once every other day) in the absence or presence of Z-VAD-FMK (10 mg/kg, i.p., once every other day) or necrosulfonamide (10 mg/kg, i.p., once every other day) starting at day 7 for 2 weeks. Tumor volumes were calculated weekly ( $n = 5$  mice/group). Data are presented as mean  $\pm$  SD. The results are representative of those from 2 independent experiments.

### Supplementary Table 1

#### Primers used in this study

| Gene                 | Forward                       | Reverse                       |
|----------------------|-------------------------------|-------------------------------|
| human <i>NUPR1</i>   | 5'-GACTCCAGCCTGGATGAATCTG-3'  | 5'-CTTCTCTCTTGGTGCGACCTTTC-3' |
| mouse <i>Nupr1</i>   | 5'-GAATATGATCAGTACAGCCTGGC-3' | 5'-CAGAGTTCTGGAACCTGGTCAGC-3' |
| human <i>LCN2</i>    | 5'-GTGAGCACCAACTACAACCAGC-3'  | 5'-GTTCCGAAGTCAGCTCCTTGGT-3'  |
| mouse <i>Lcn2</i>    | 5'-ATGTCACCTCCATCCTGGTCAG-3'  | 5'-GCCACTTGCACATTGTAGCTCTG-3' |
| human <i>PTGS2</i>   | 5'-CGGTGAAACTCTGGCTAGACAG-3'  | 5'-GCAAACCGTAGATGCTCAGGGA-3'  |
| mouse <i>Ptgs2</i>   | 5'-GCGACATACTCAAGCAGGAGCA-3'  | 5'-AGTGGTAACCGCTCAGGTGTTG-3'  |
| human <i>ATF4</i>    | 5'-TTCTCCAGCGACAAGGCTAAGG-3'  | 5'-CTCCAACATCCAATCTGTCCCG-3'  |
| mouse <i>Steap3</i>  | 5'-TCTTCAGCACCGCCAGTCTAAC-3'  | 5'-CTGGCTGATCACTGCAGATGAG-3'  |
| mouse <i>Tfrc</i>    | 5'-GAAGTCCAGTGTGGGAACAGGT-3'  | 5'-CAACCACTCAGTGGCACCAACA-3'  |
| mouse <i>Slc11a2</i> | 5'-TTGCAGCGAGACTTGGAGTGGT -3' | 5'-GCTGAGCCAATGACTTCCTGCA -3' |
| mouse <i>Ftl</i>     | 5'-CCTCGAGTTTCAGAACGATCGC-3'  | 5'-CCTGATTCAGGTTCTTCTCCATG-3' |
| mouse <i>Fth1</i>    | 5'-GCCGAGAAACTGATGAAGCTGC-3'  | 5'-GCACACTCCATTGCATTAGCC-3'   |
| mouse <i>Slc40a1</i> | 5'-CCATAGTCTCTGTCAGCCTGCT-3'  | 5'-CTTGCAGCAACTGTGTCACCGT-3'  |
| human <i>18SRNA</i>  | 5'-CTACCACATCCAAGGAAGCA-3'    | 5'-TTTTTCGTCACTACCTCCCCG-3'   |
| mouse <i>18srna</i>  | 5'-GCAATTATTCCCCATGAACG-3'    | 5'-GGCCTCACTAAACCATCCAA-3'    |
